# Supplementary figures and images for: A novel quaternized carbon dot–papain complex for the double-target anti-biofilm activity and visualization-ratio fluorescence dual-mode detection of H2O2
Source: Royal Society of Chemistry journal article supplement (doi:10.1039/d2qm00347c), 2022-01-01

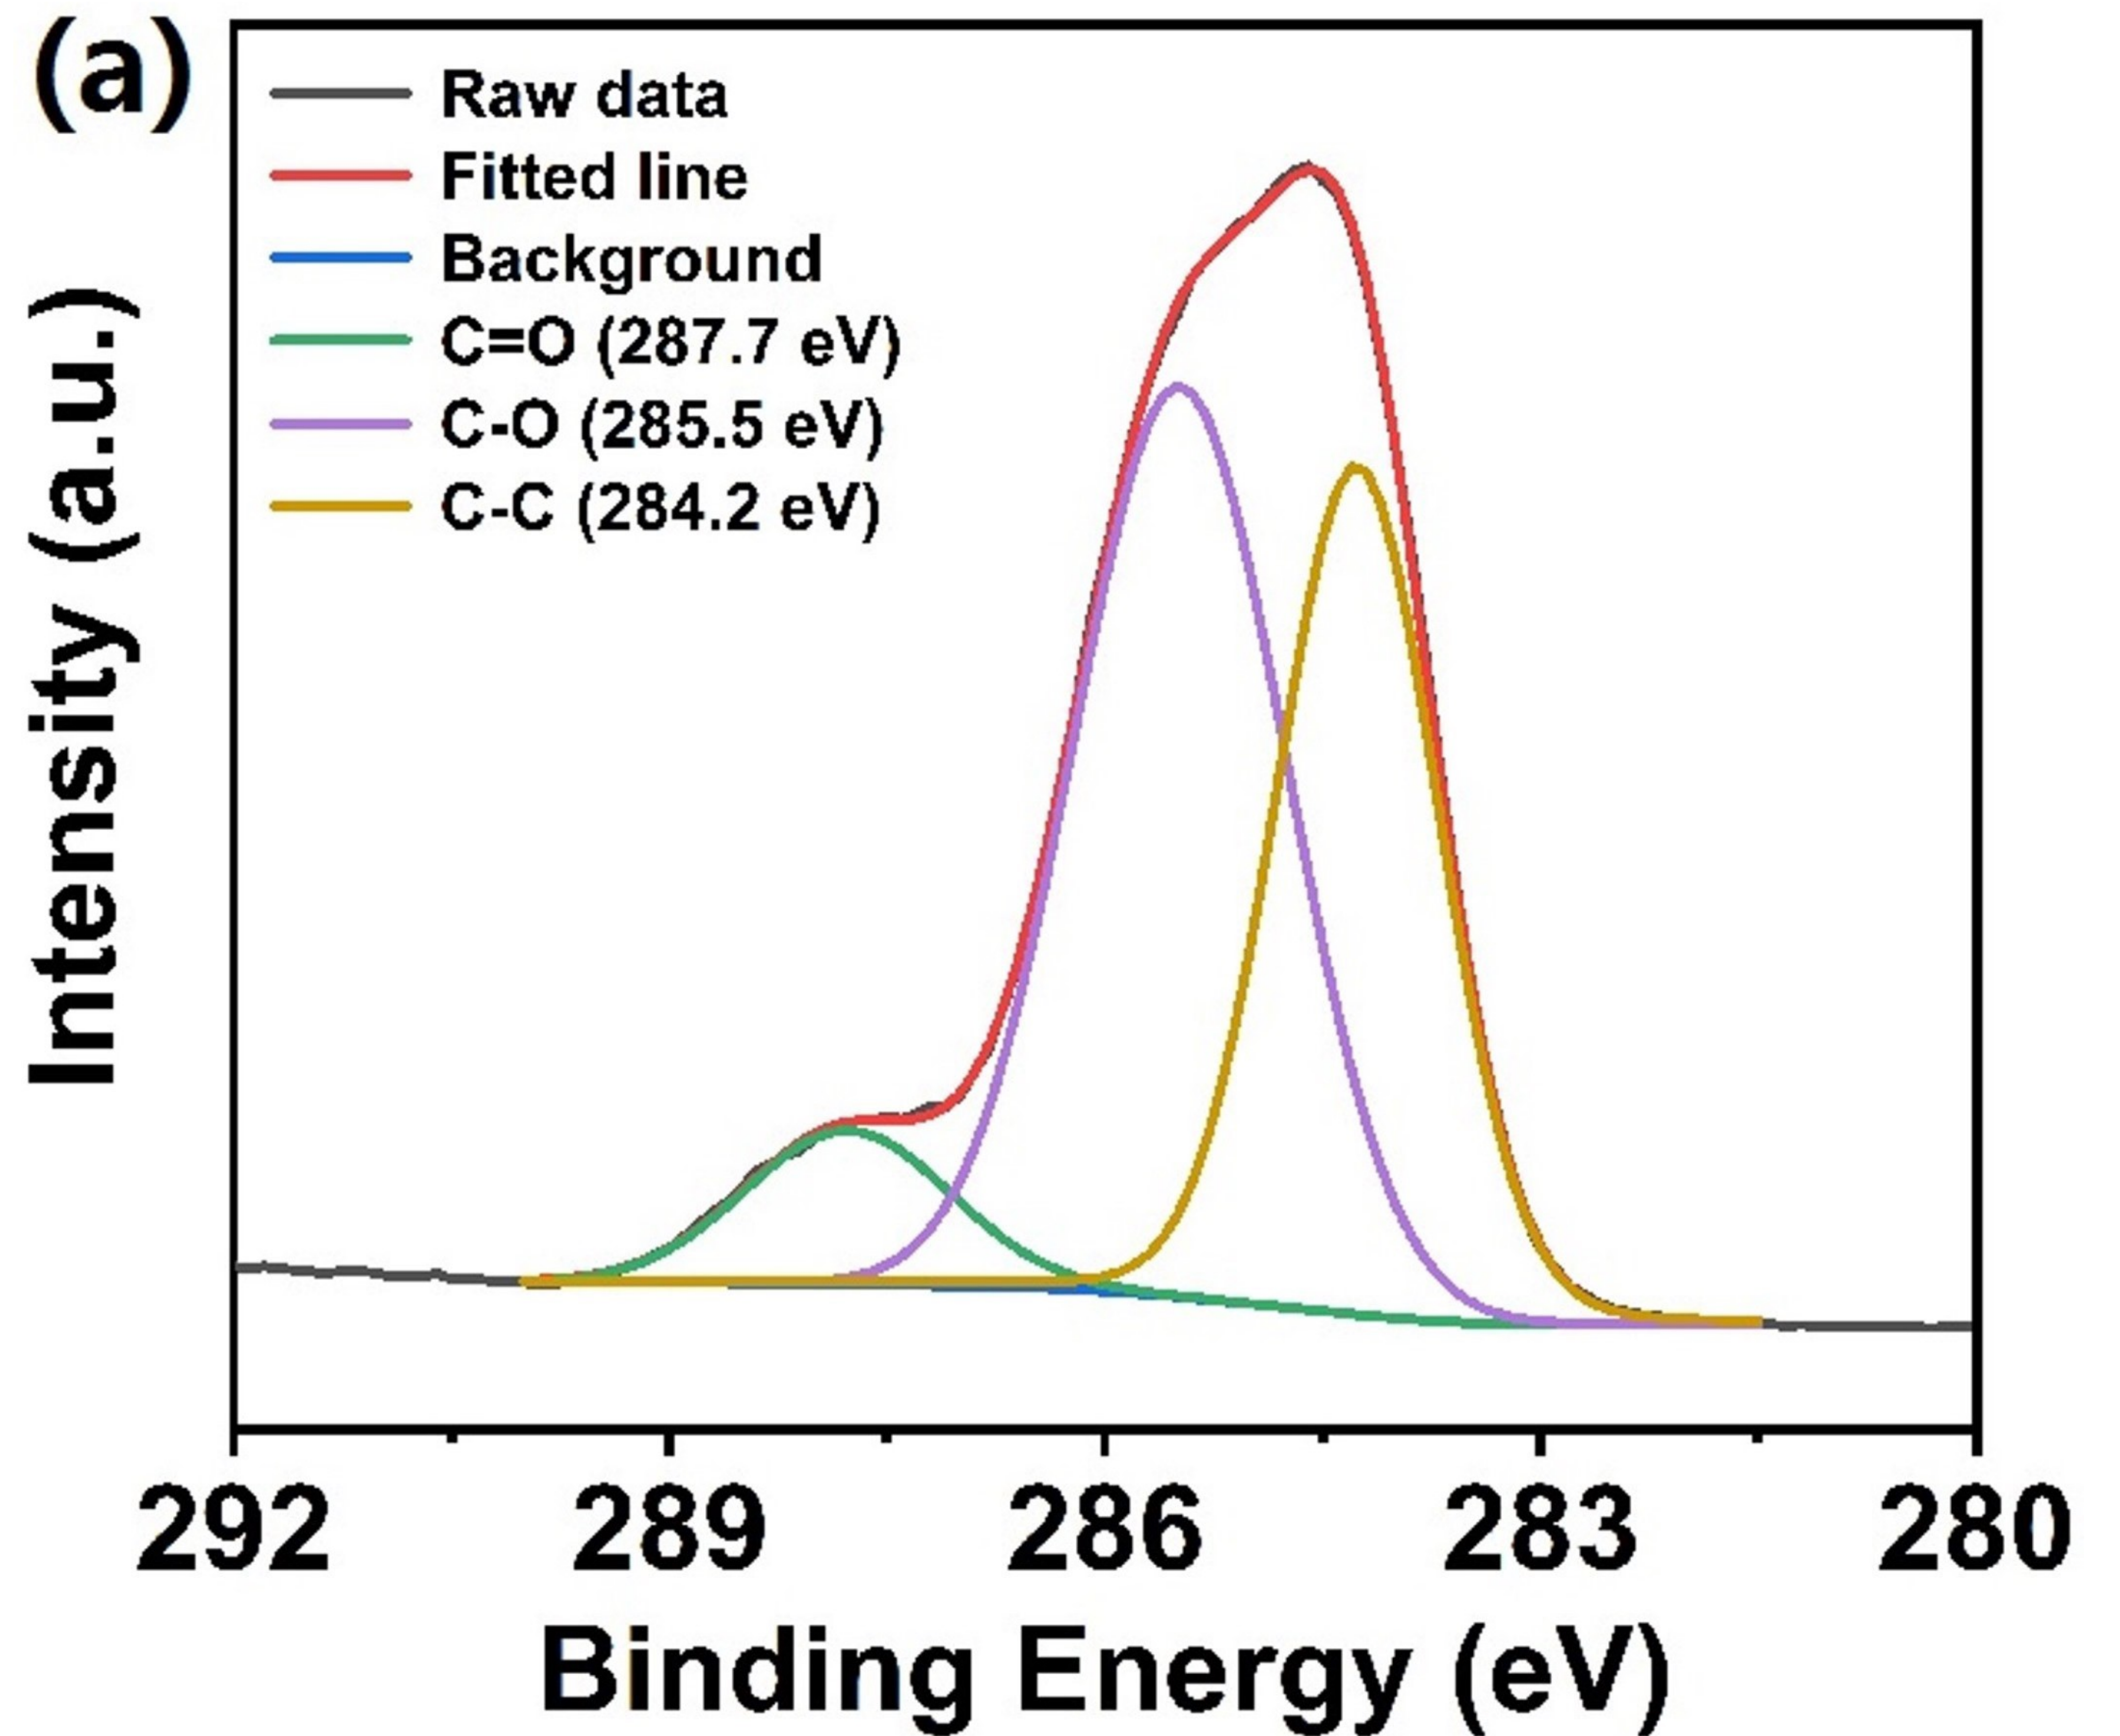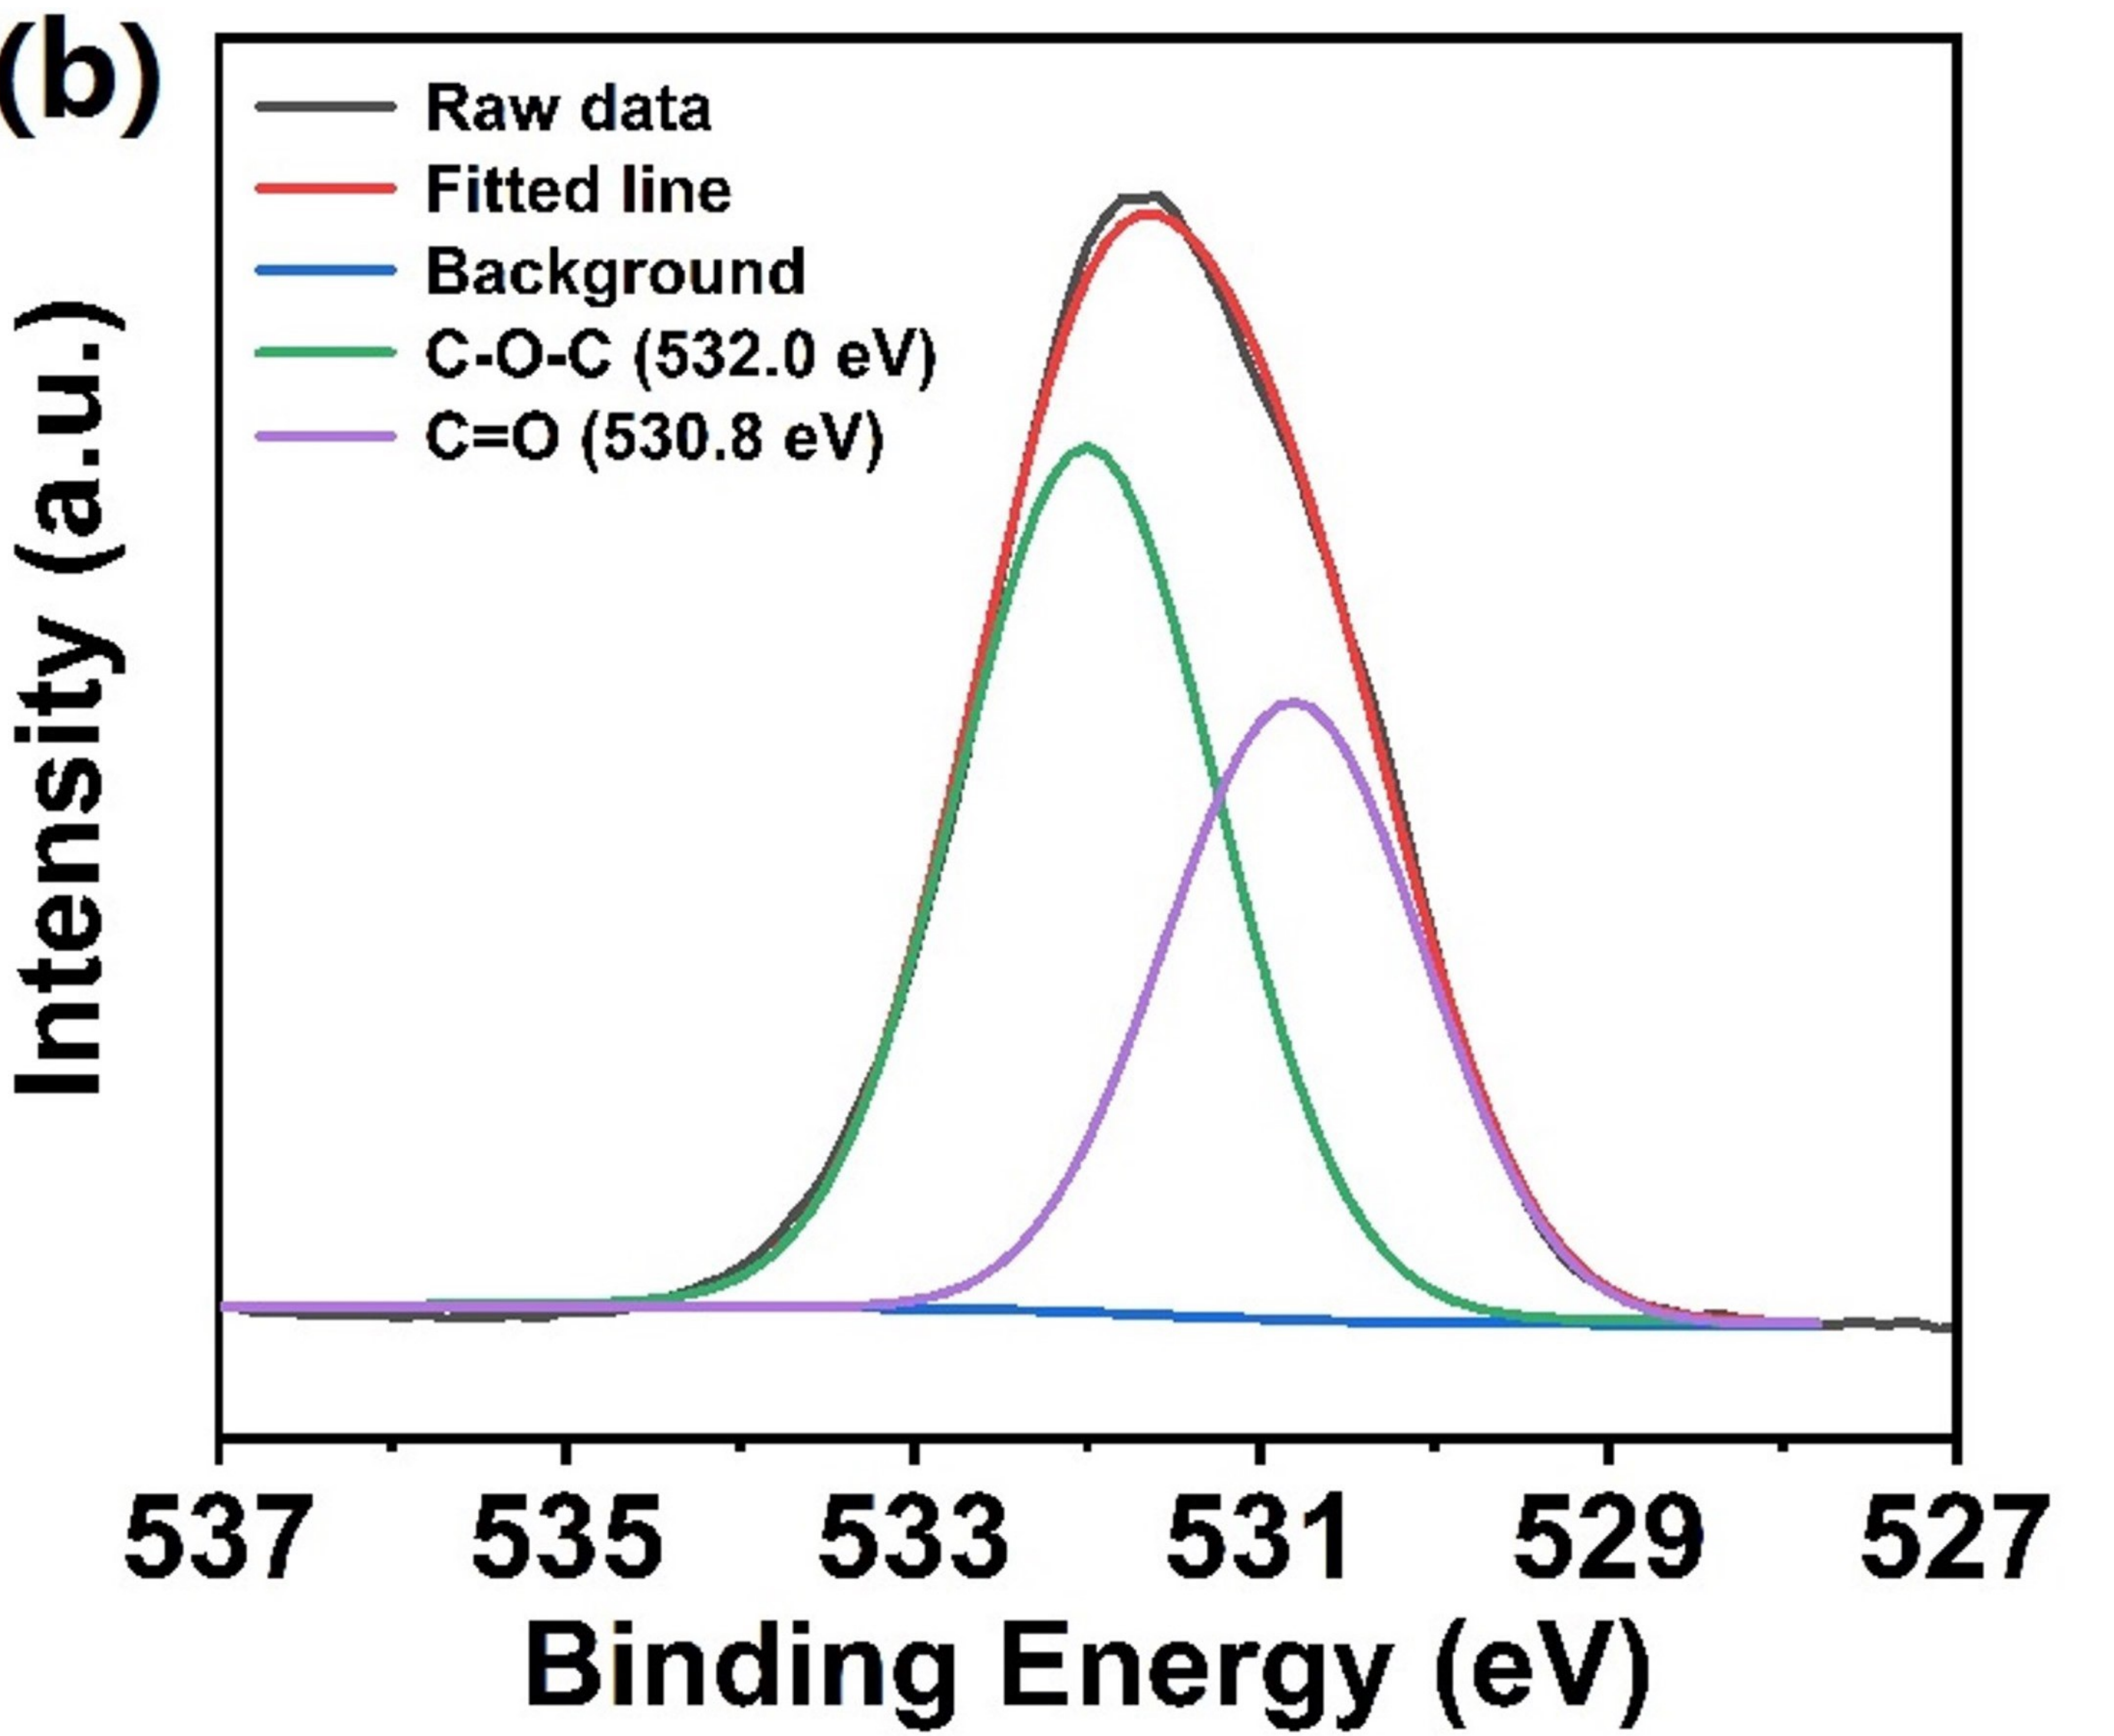

Supplement: d2qm00347c2.pdf [file d2qm00347c2.pdf]

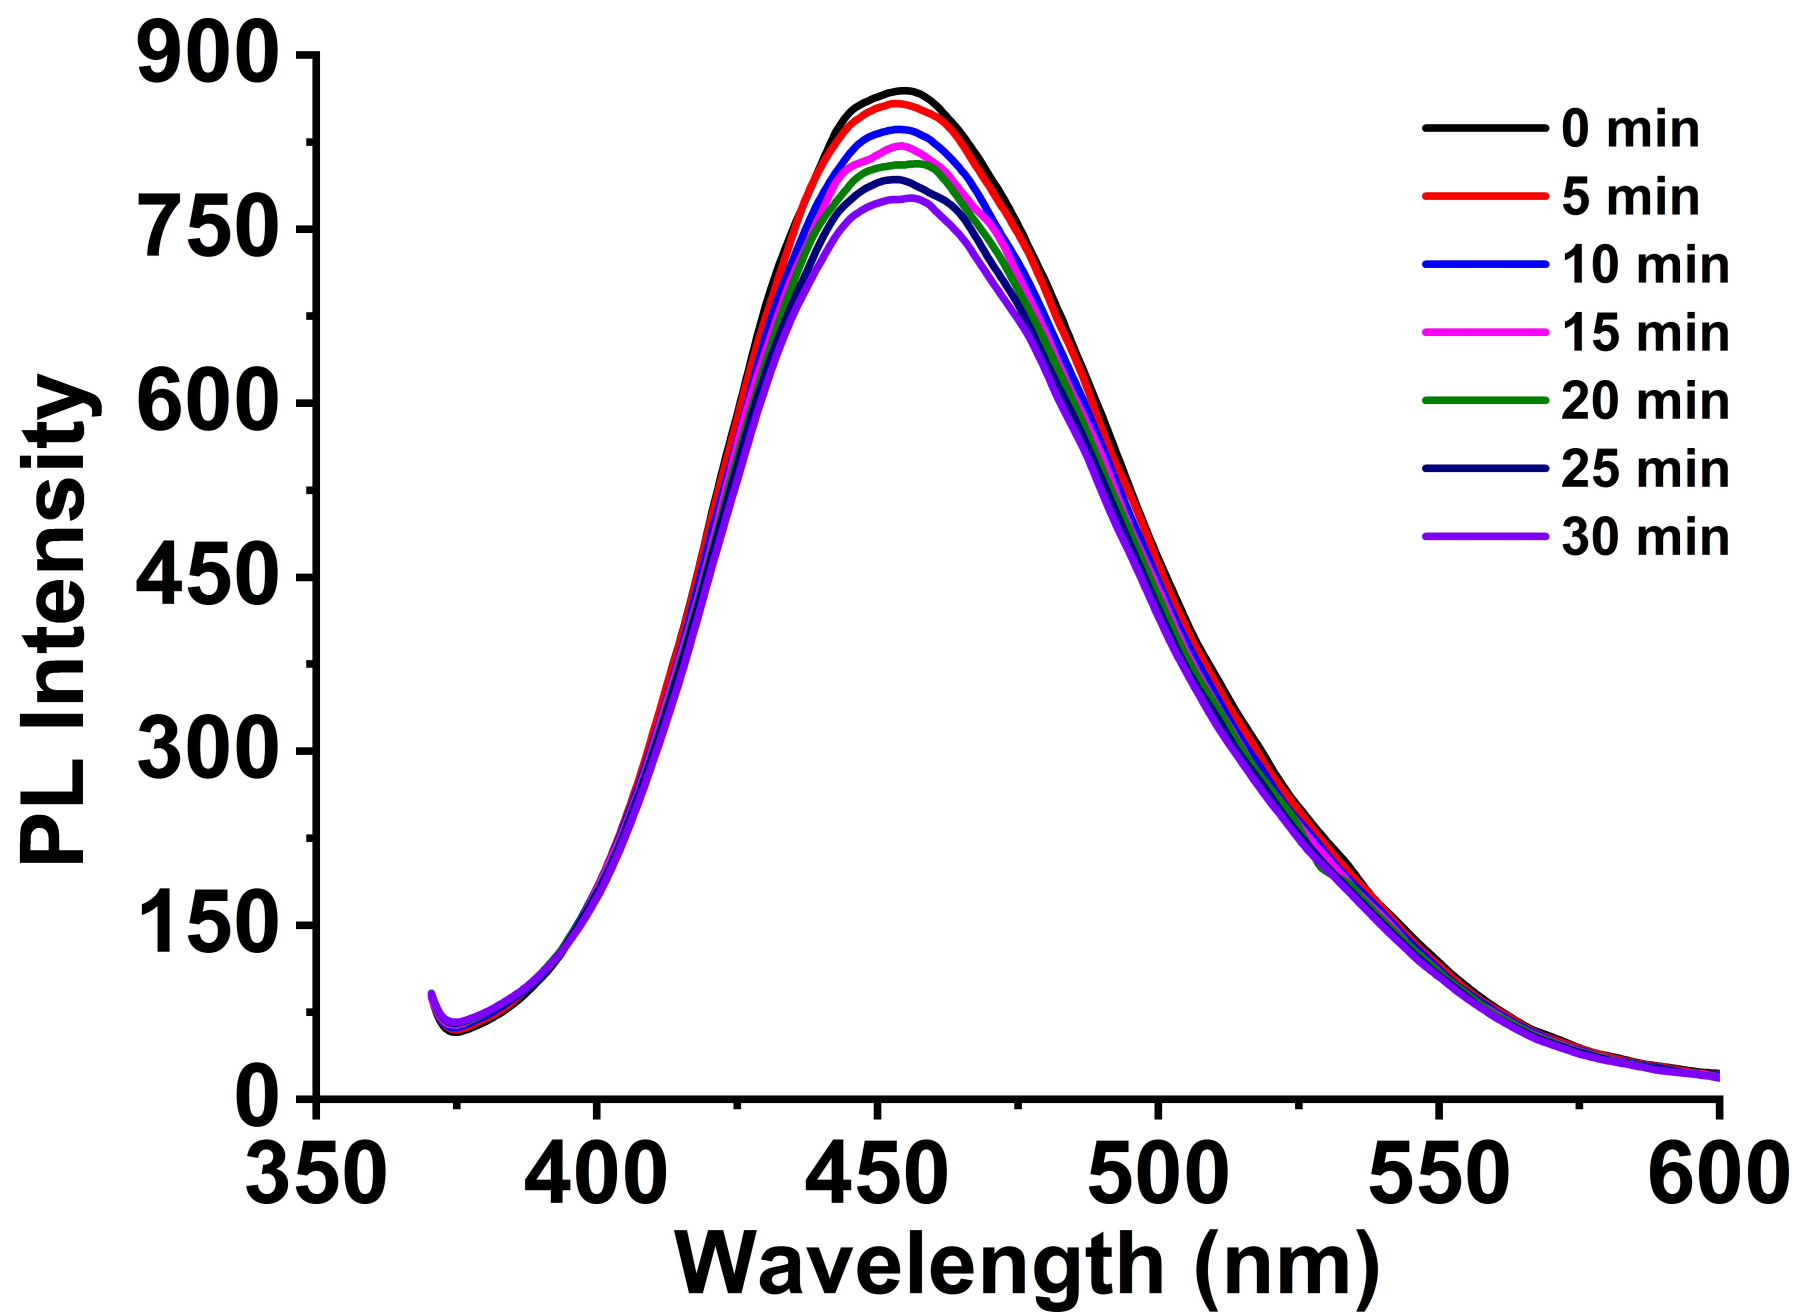

Supplement: d2qm00347c3.pdf [file d2qm00347c3.pdf]

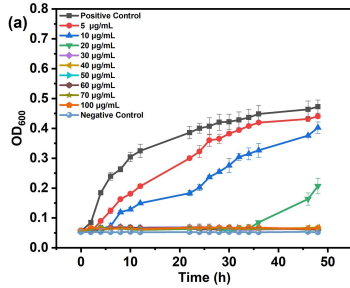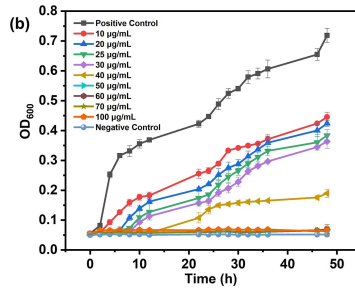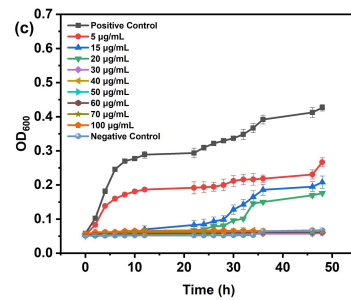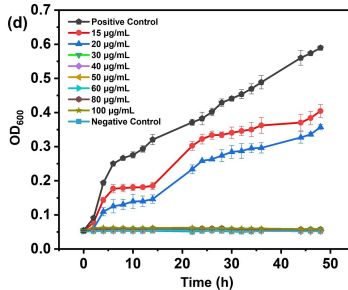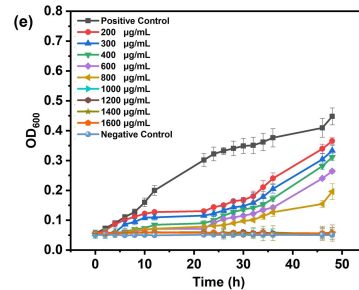

Supplement: d2qm00347c4.pdf [file d2qm00347c4.pdf]

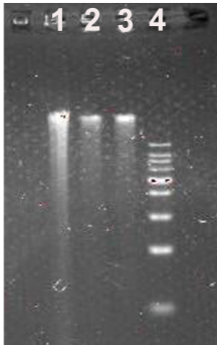

Supplement: d2qm00347c5.pdf [file d2qm00347c5.pdf]

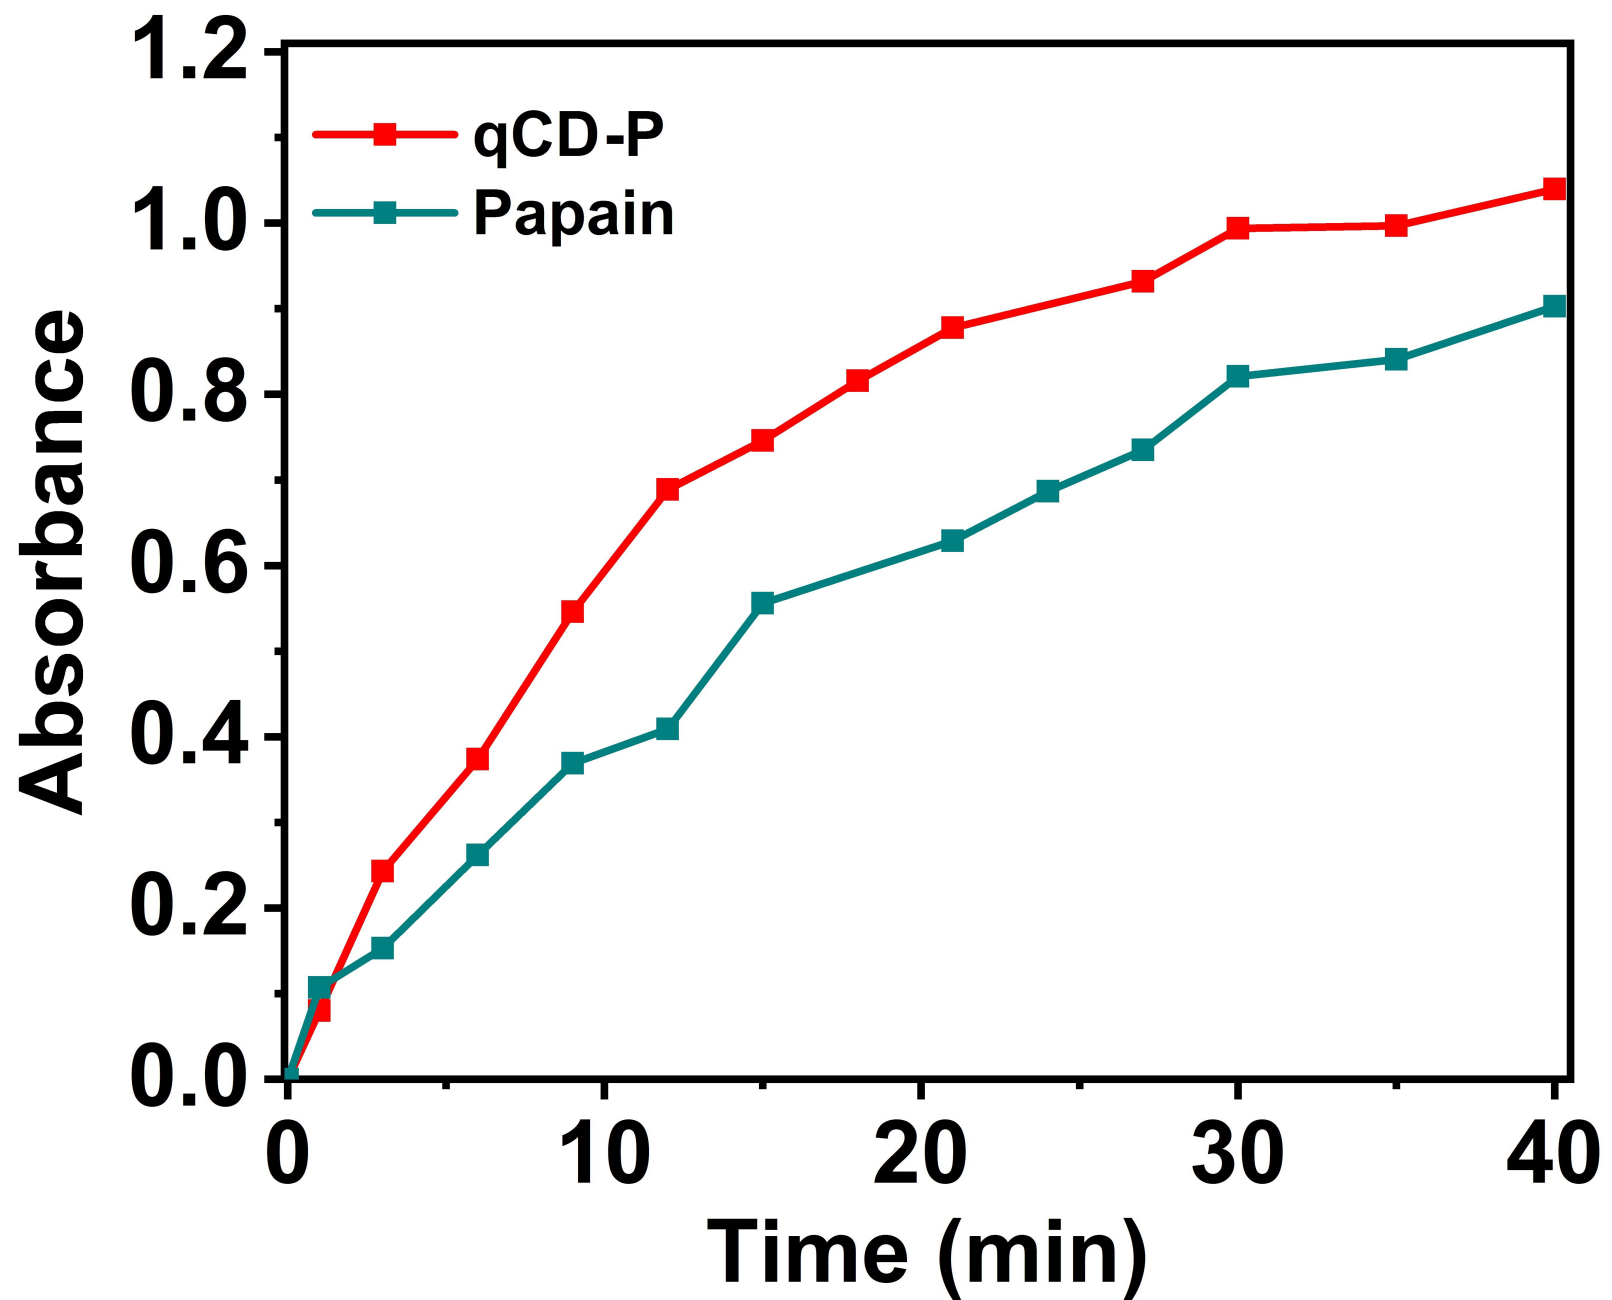

Supplement: d2qm00347c6.pdf [file d2qm00347c6.pdf]
